# Supplementary material for: High-throughput metabolomics analysis discovers salivary biomarkers for predicting mild cognitive impairment and Alzheimer's disease
Source: Royal Society of Chemistry journal article supplement (doi:10.1039/c6ra16802g), 2016-01-01
Supplement: c6ra16802g1.pdf [file c6ra16802g1.pdf]

**Table S1.** Clinical Characteristics of the Patients

| Characteristics        | MCI (n = 583) | AD (n = 660) | P value |
|------------------------|---------------|--------------|---------|
| Age, years             | 78.9±4.9      | 78.6±5.7     | 0.1176  |
| Sex (male/female)      | 289/294       | 328/332      | 0.5349  |
| BMI, kg/m <sup>2</sup> | 23.34±2.40    | 23.76±2.81   | 0.6637  |
| DBP, mmHg              | 74.33±13.72   | 75.74±11.27  | 0.1319  |
| SBP, mmHg              | 150.94±23.55  | 152.00±22.7  | 0.0675  |
|                        |               | 2            |         |
| MMSE                   | 30.8±4.6      | 15.7±2.8     | 0.0002  |
| CAMCOG                 | 86.8±12.7     | 60.4±17.2    | 0.0008  |
| A-AP, pg/mL            | 62.0±7.2      | 87.5±8.9     | 0.0007  |

Note: A-AP, A-amyloid protein; BMI, body mass index; DBP, diastolic blood pressure; SBP, systolic blood pressure; MMSE, Mini-Mental State Examination score; CAMCOG, cambridge cognitive test. All data are presented as mean ± standard deviation. Parameter values were compared using t-test. The p values less than 0.05 were considered significant.
